# Supplementary material for: ASAR Dataset and Computational Model for Affective State Recognition During ARAT Assessment for Upper Extremity Stroke Survivors
Source: Atypon-hosted journal article supplement (doi:10.1145/3610661.3617154), 2023-10-09
Supplement: Supplementary Document.pdf [file Supplementary%20Document.pdf]

## Supplementary Document

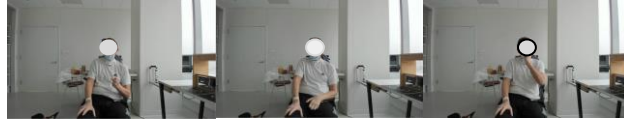

**Figure 1:** Three different affective states from left: engagement, neutral, and pain

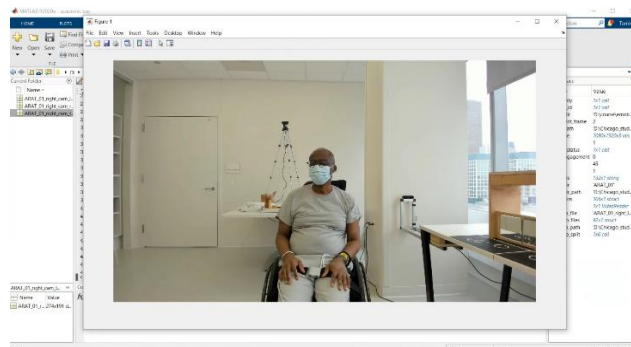

**Figure 2:** Data Labeling GUI

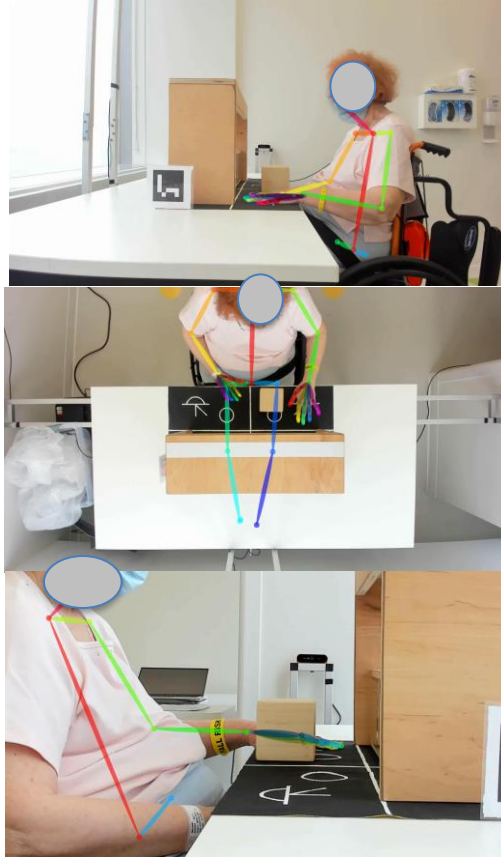

**Figure 3:** OPENPOSE output overlapped on the original RGB images for three different angles
